# Supplementary material for: LINE-1 ORF2p expression is nearly imperceptible in human cancers
Source: PubMed Central journal article supplement (PMC6937734; doi:10.1186/s13100-019-0191-2), 2019-12-31

**A**

### Clustal Alignment of 146 Full-length Human L1 Sequences

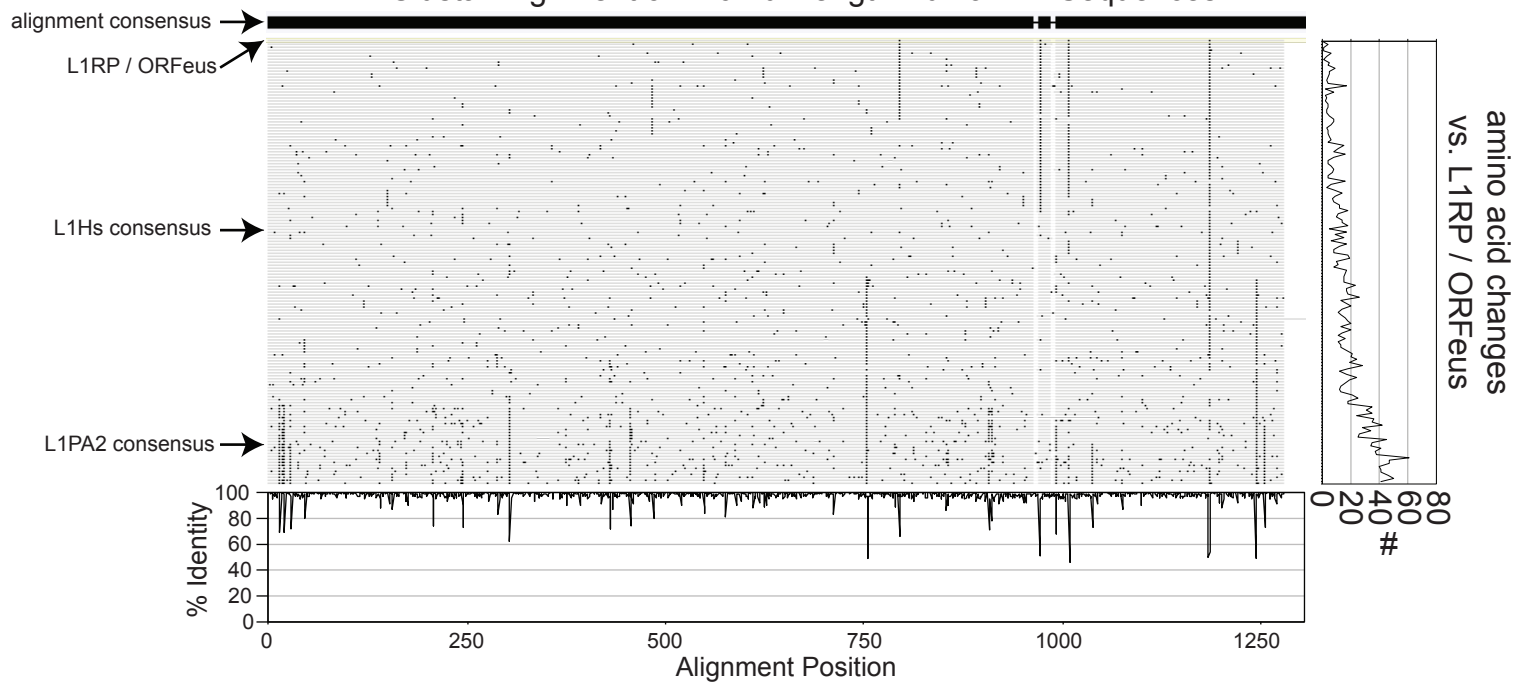**B**

### Clustal Alignment of 107 ORF2-intact Human L1 Sequences

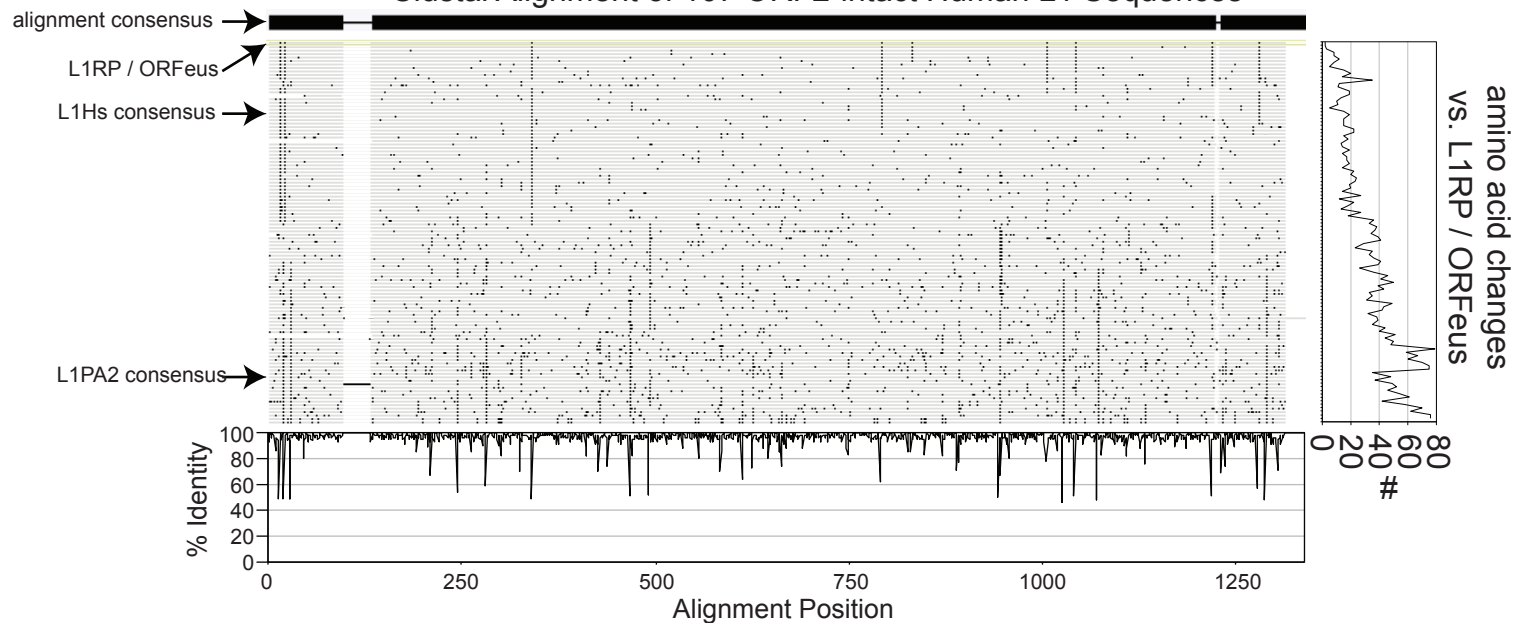

Supplement: 13100_2019_191_MOESM1_ESM.pdf [file 13100_2019_191_MOESM1_ESM.pdf]
