# Supplementary material for: LINE-1 ORF2p expression is nearly imperceptible in human cancers
Source: PubMed Central journal article supplement (PMC6937734; doi:10.1186/s13100-019-0191-2), 2019-12-31
Supplement: 13100_2019_191_MOESM3_ESM.pdf [file 13100_2019_191_MOESM3_ESM.pdf]

**Figure S4**

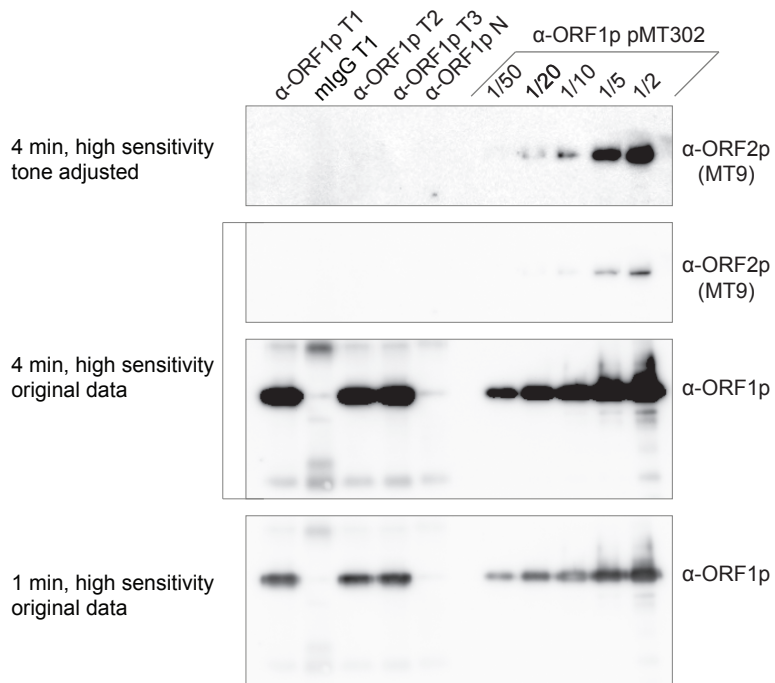

**Tumor D:** Metastatic sigmoid colon cancer, Liver  
Three different metastatic segments were compared: T1, T2, T3
