# Supplementary material for: LINE-1 ORF2p expression is nearly imperceptible in human cancers
Source: PubMed Central journal article supplement (PMC6937734; doi:10.1186/s13100-019-0191-2), 2019-12-31
Supplement: 13100_2019_191_MOESM4_ESM.pdf [file 13100_2019_191_MOESM4_ESM.pdf]

0.4  $\mu\text{g/ml}$   
 $\alpha$ -ORF1p

2  $\mu\text{g/ml}$   
 $\alpha$ -ORF1p

pMT302

pLD222

293 Flip-In T-Rex

PA-1

HeLa Kyoto

2.5  $\mu\text{g}$

25  $\mu\text{g}$

pMT302

pLD222

293 Flip-In T-REx

PA-1

HeLa Kyoto

2.5  $\mu\text{g}$

25  $\mu\text{g}$

I S I S I S I S I S

I S I S I S I S I S

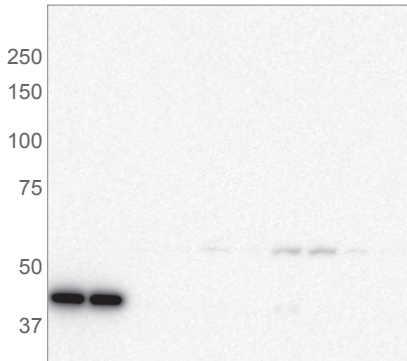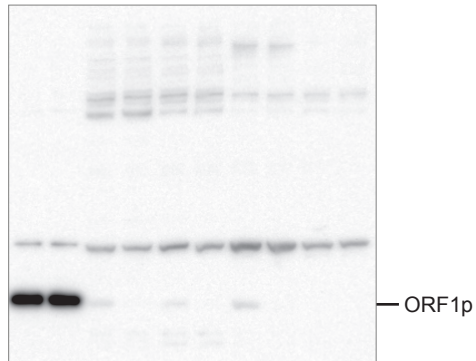

$\alpha$ -UPF1

$\alpha$ -PCNA
