# Supplementary material for: LINE-1 ORF2p expression is nearly imperceptible in human cancers
Source: PubMed Central journal article supplement (PMC6937734; doi:10.1186/s13100-019-0191-2), 2019-12-31

**A.**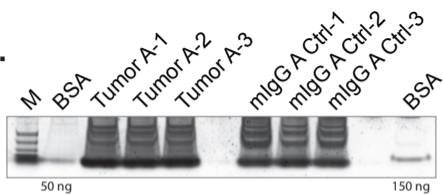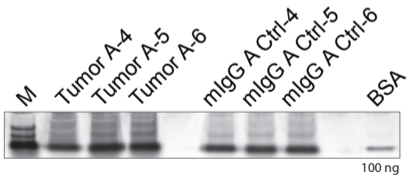**B.**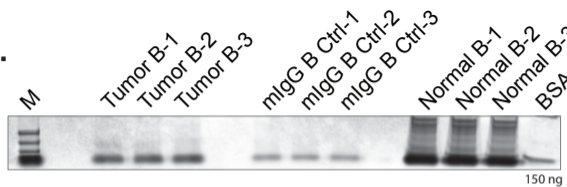**C.**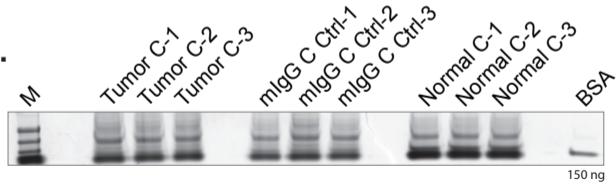

Supplement: 13100_2019_191_MOESM5_ESM.pdf [file 13100_2019_191_MOESM5_ESM.pdf]
